# Supplementary material
Source: PubMed Central journal article supplement (PMC6945506)
Supplement: NIHMS1062545-supplement-Supporting_Information.pdf [file NIHMS1062545-supplement-Supporting_Information.pdf]

# Protein Engineered Nanoscale Micelles for Dynamic <sup>19</sup>F Magnetic Resonance and Therapeutic Drug Delivery

Lindsay K. Hill<sup>†,‡,§,¶,°</sup>, Joseph A. Frezzo<sup>†,°</sup>, Priya Katyal<sup>†</sup>, Dung Minh Hoang<sup>‡,§</sup>, Zakia Ben Youss Gironda<sup>‡,§</sup>, Cynthia Xu<sup>†</sup>, Xuan Xie<sup>†</sup>, Erika Delgado-Fukushima<sup>†</sup>, Youssef Z. Wadghiri<sup>‡,§,\*</sup>, Jin Kim Montclare<sup>†,§,||,⊥,\*</sup>

<sup>†</sup>. Department of Chemical and Biomolecular Engineering, New York University Tandon School of Engineering, Brooklyn, New York, 11201, USA

<sup>‡</sup>. Center for Advanced Imaging Innovation and Research (CAI<sup>2</sup>R), New York University School of Medicine, New York, New York, 10016, USA

<sup>§</sup>. Bernard and Irene Schwartz Center for Biomedical Imaging, Department of Radiology, New York University School of Medicine, New York, New York, 10016, USA

<sup>¶</sup>. Department of Biomedical Engineering, SUNY Downstate Medical Center, Brooklyn, New York, 11203, USA

<sup>||</sup>. Department of Chemistry, New York University, New York, New York, 10012, USA

<sup>⊥</sup>. Department of Biomaterials, New York University College of Dentistry, New York, New York, 10010, USA

\* Corresponding Authors

Email: [Montclare@nyu.edu](mailto:Montclare@nyu.edu), [Youssef.ZaimWadghiri@nyulangone.org](mailto:Youssef.ZaimWadghiri@nyulangone.org)

<sup>°</sup> These two authors contributed equally to this work

## SUPPORTING INFORMATION

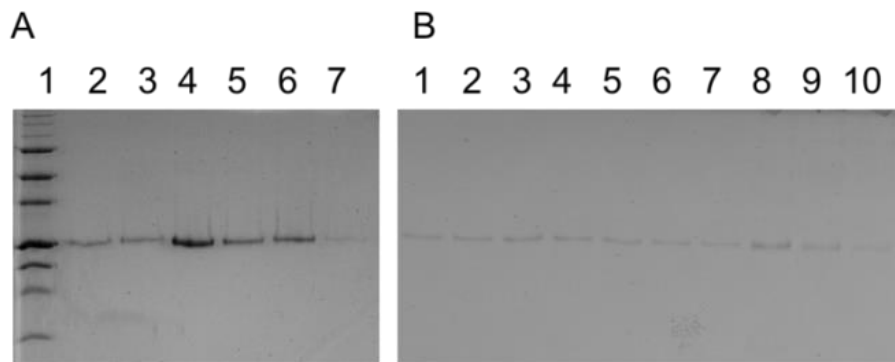

**Figure S1.** SDS-PAGE of post-purification protein elutions under increasing imidazole concentrations showing A) F-TRAP purity: 1- Ladder, 2- 100 mM, 3- 100 mM, 4- 150 mM, 5- 150 mM, 6- 300 mM, 7- 300 mM imidazole and B) TRAP purity: 1- 100 mM, 2- 100 mM, 3- 100 mM, 4- 150 mM, 5- 150 mM, 6- 300 mM, 7- 300 mM, 8- 500 mM, 9- 500 mM, 10-1000 mM imidazole.

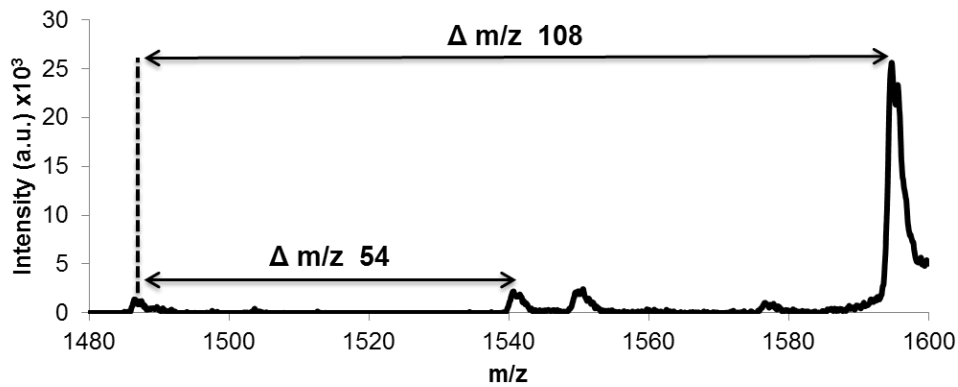

**Figure S2.** MALDI-TOF spectra of tryptic fragment  $EL_{TFL}QETNAAL_{TFL}QDVR$ .

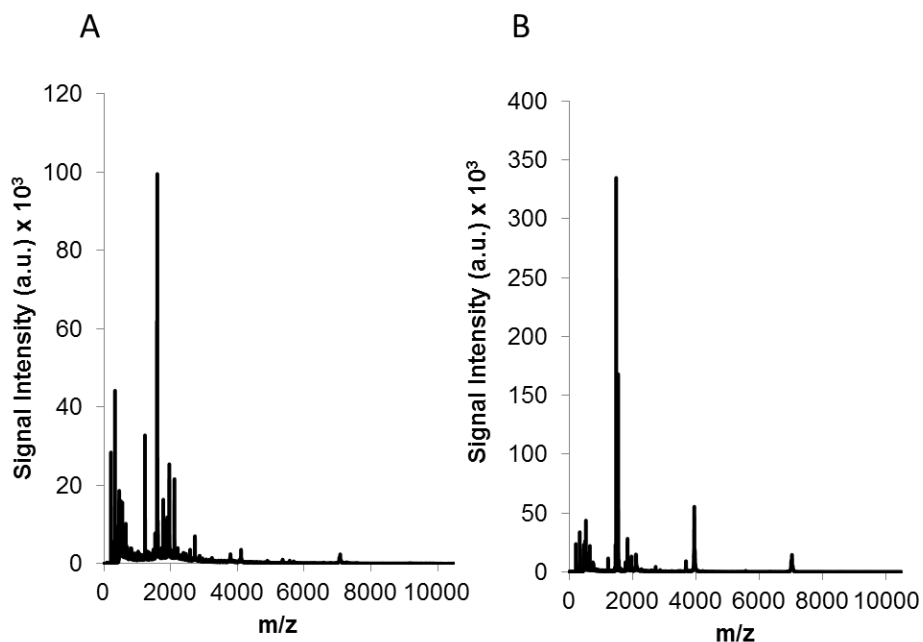

**Figure S3.** MALDI-TOF spectra of A) TRAP and B) F-TRAP.

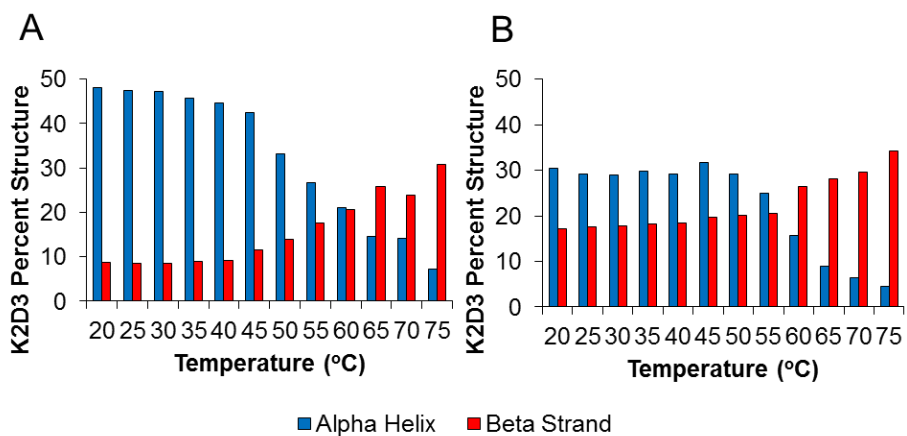

**Figure S4.** Secondary structure analysis of A) TRAP and B) F-TRAP as analyzed by K2D3 circular dichroism deconvolution software.

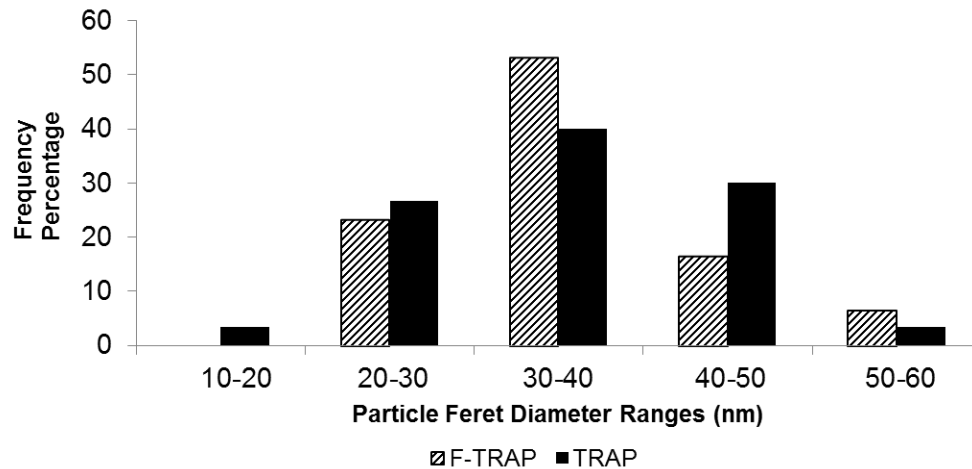

**Figure S5.** Frequency distribution of feret diameters for F-TRAP (hashed) and TRAP (solid) particles measured on transmission electron micrographs. Values measured using ImageJ.

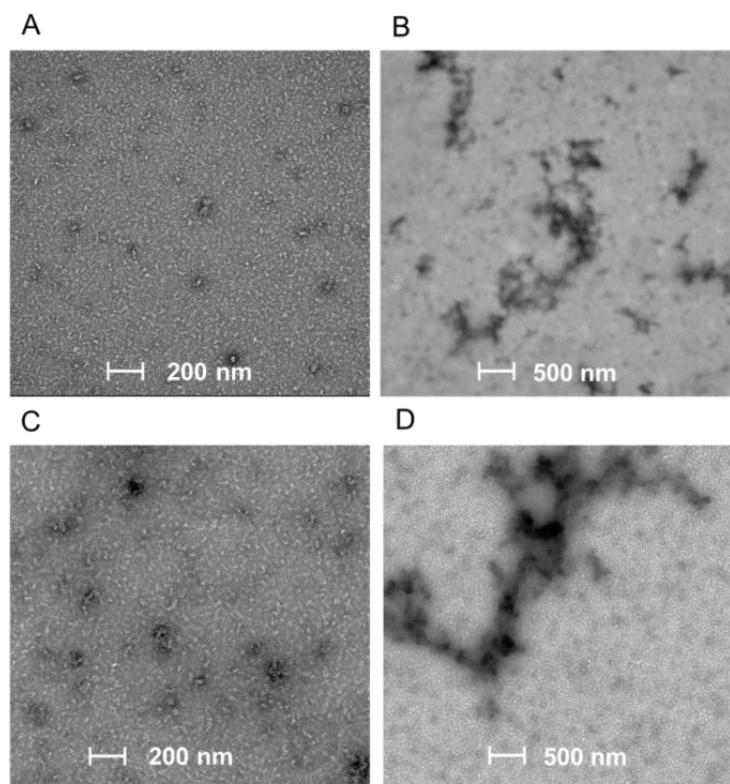

**Figure S6.** Transmission electron micrographs of F-TRAP at A) 20°C and B) 50°C, and TRAP at C) 20°C and D) 50°C.

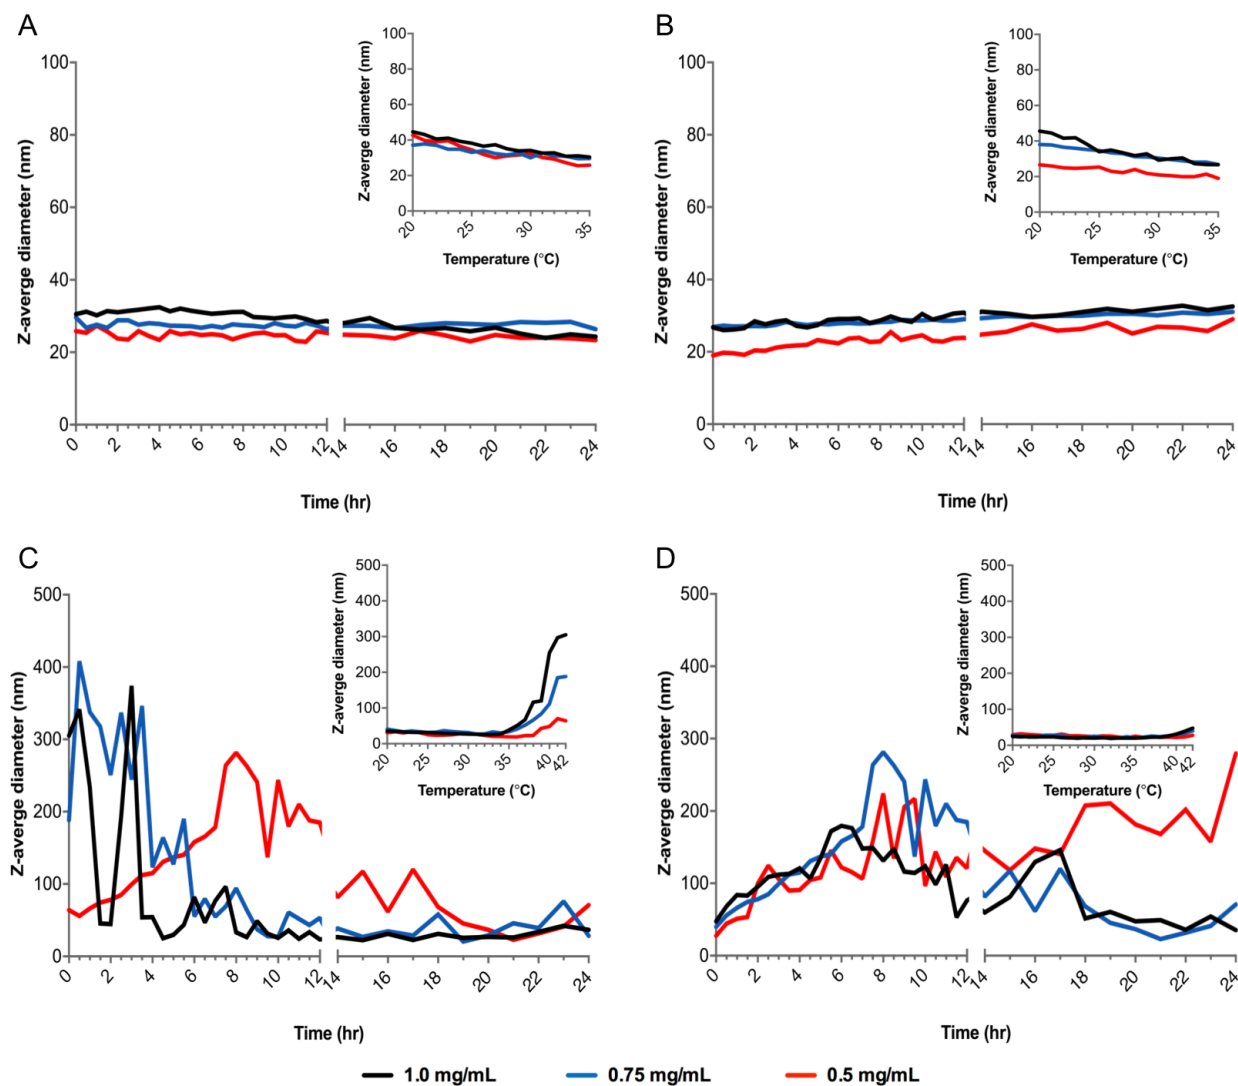

**Figure S7.** A) F-TRAP and B) TRAP diameters by DLS from 20°C to 35°C (inset) and held at 35°C for up to 24 hr. C) F-TRAP and D) TRAP diameters by DLS from 20°C to 42°C (inset) and held at 42°C for up to 24 hr.

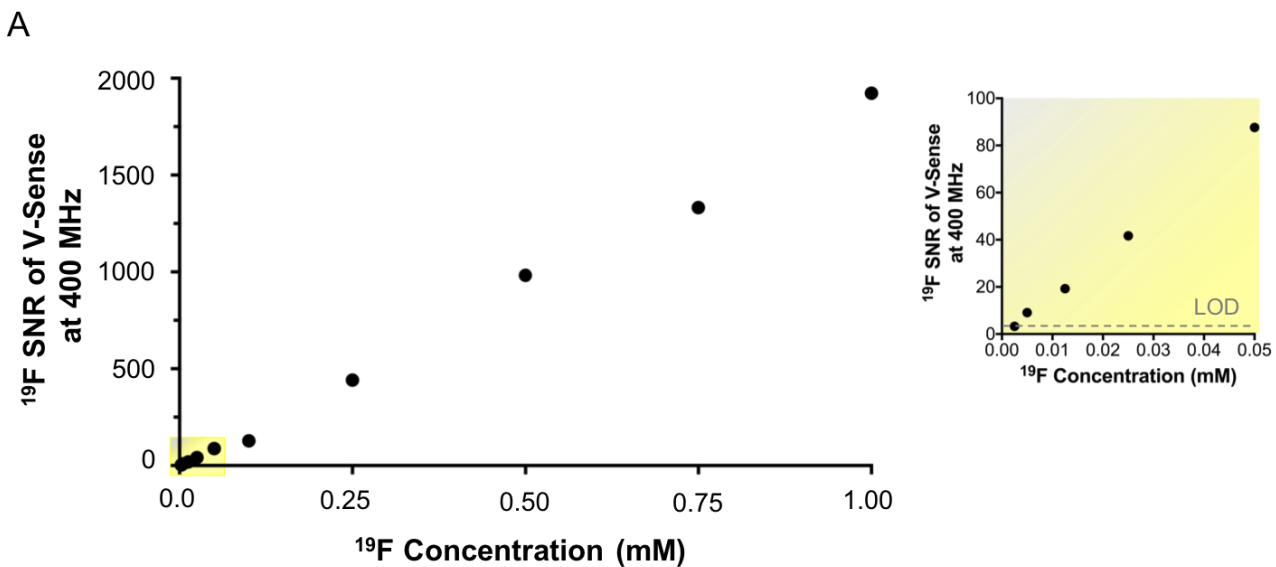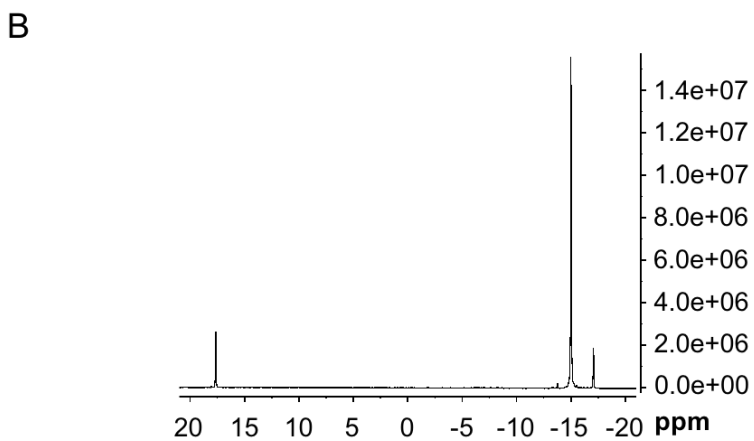

**Figure S8.** A) Signal-to-noise ratios (SNR) from one-dimensional  $^{19}\text{F}$  NMR spectra of V-Sense diluted from 1.0 mM  $^{19}\text{F}$  to its limit of detection (LOD), at which  $\text{SNR}=3$ ,<sup>1</sup> of 0.0025 mM  $^{19}\text{F}$ . Inset is focused on the lower  $^{19}\text{F}$  concentrations to better show the LOD. B) Representative NMR spectra of V-Sense at 0.75 mM  $^{19}\text{F}$ .

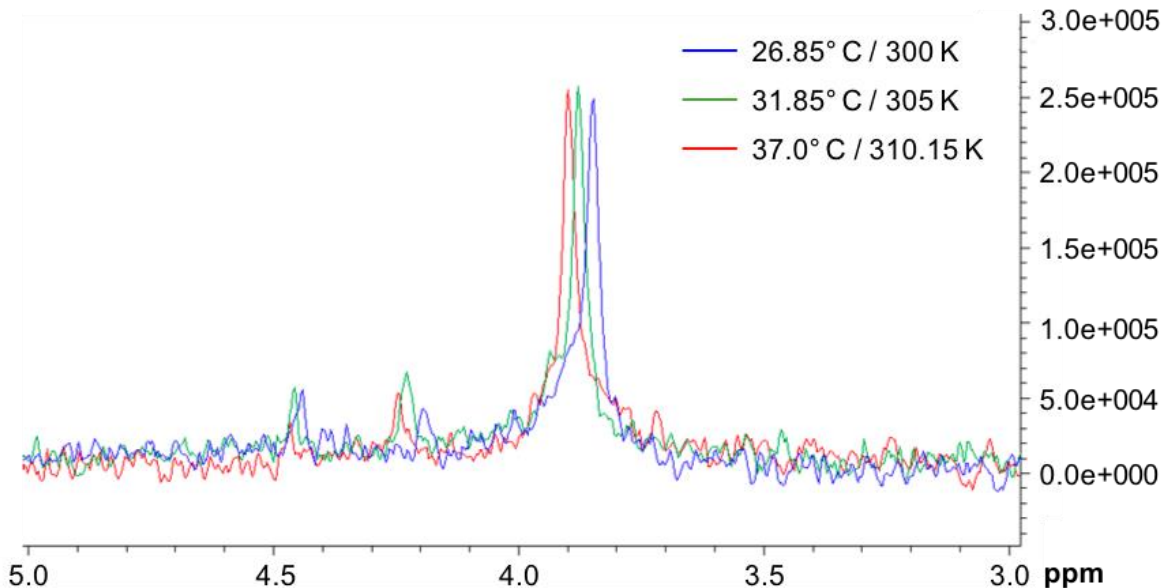

**Figure S9.** One-dimensional <sup>19</sup>F NMR spectra for F-TRAP (1.0 mg/mL, 1.63 mM <sup>19</sup>F) zoomed over a 2 ppm chemical shift window acquired at 400 MHz (9.4 Tesla) to show the three F-TRAP peaks acquired while increasing the temperature from 26.85 to 31.85 and 37.0°C, each calibrated to a 10% Trifluoroethanol/10% D<sub>2</sub>O/80% H<sub>2</sub>O standard acquired at the corresponding temperature. It must be noted that the < 1 ppm chemical shift spread covered by these three peaks translates into an absolute frequency excursion of 300 Hz at 7 Tesla (300 MHz). This three-peak frequency spread is more than half the receiver sweep width (SW) chosen for the ZTE sequence (SW=781 Hz/pixel) used to acquire the <sup>19</sup>F images shown in Figure S10. Importantly, this greater SW enables the integration of the signal from the three peaks into a single pixel while preventing chemical shift artifacts commonly seen in the frequency-encoding as spatially mis-registered pixels.

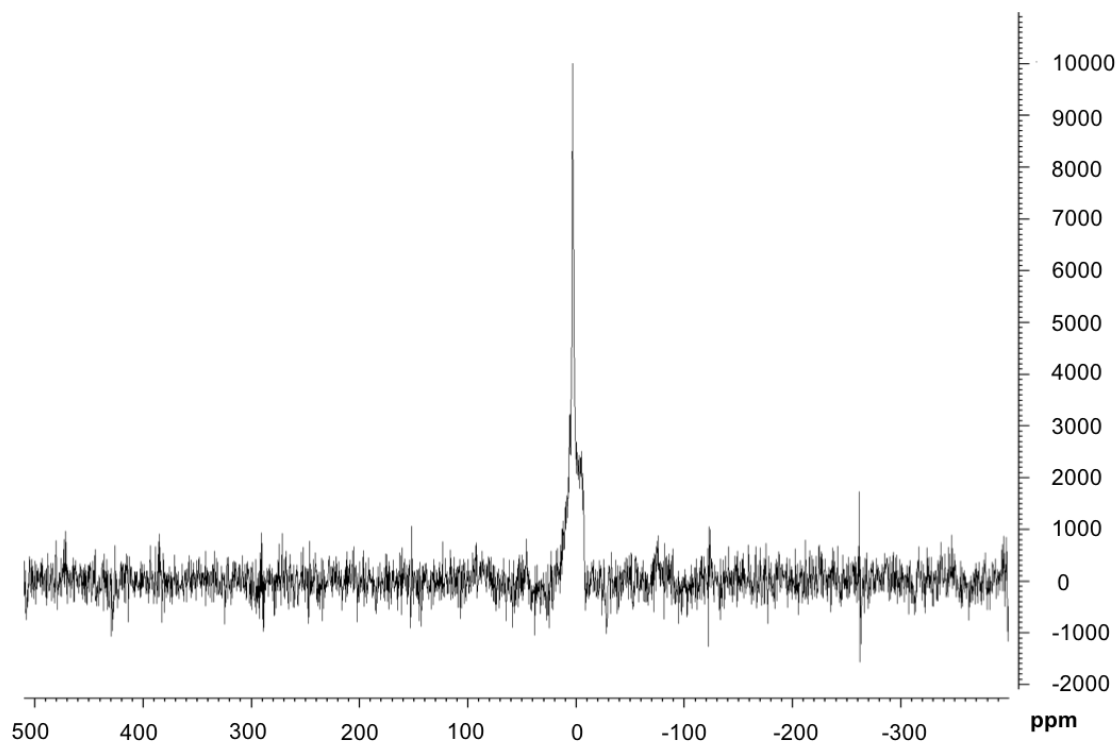

**Figure S10.**  $^{19}\text{F}$  MRS of a phantom F-TRAP sample at 13.40 mg/mL or 0.82 mM protein, equivalent to 21.90 mM  $^{19}\text{F}$ , acquired in 6 min 40 sec at 7 Tesla (300 MHz).

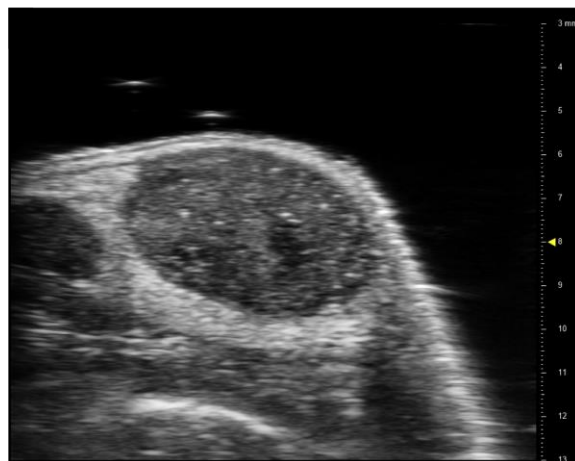

**Figure S11.** Example of a 2D high frequency ultrasound image showing the MCF-7 tumor mass implanted in an CrTac:NCr-*Foxn1*<sup>tmu</sup> mouse in order to rapidly assess the 3D tumor volume and perform real-time guided intratumoral injection of NIR-F-TRAP.



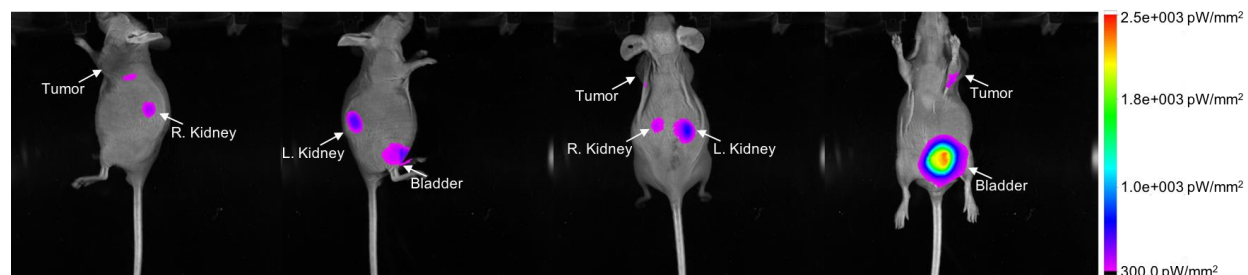

**Figure S12.** Example of *in vivo* dual multispectral VIS-NIR fluorescence and reflectance imaging, shown in four different orientations, using a bioluminescence and fluorescence scanner 24 hours following intratumoral injection of NIR-F-TRAP into an MCF-7 xenograft CrTac:NCr-*Foxn1<sup>nu</sup>* mouse to qualitatively assess the pharmacokinetics and bioavailability of NIR-F-TRAP.

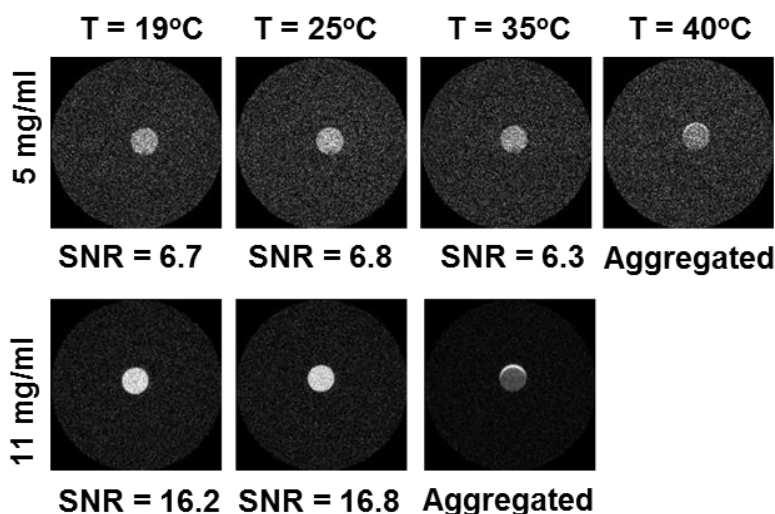

**Figure S13.** Temperature dependence of  $^{19}\text{F}$  ZTE MRI of F-TRAP at 5 mg/mL (8.17 mM  $^{19}\text{F}$ ) and 11 mg/mL (17.98 mM  $^{19}\text{F}$ ) while increasing temperature. This study aimed at illustrating the reliability of the ZTE pulse sequence despite the dramatic shortening of the transverse  $T_2$  relaxation times of F-TRAP associated with the temperature changes. Notwithstanding the large change in temperature of F-TRAP over a 16°C range, the SNR showed less than 6% deviation for both concentrations. Importantly, the MRI experiments echoed previous characterizations where increased concentration of F-TRAP is expected to lower the temperature of aggregation as depicted.

**Table S1.** Expression Yields<sup>a</sup> (mg/L) for F-TRAP and TRAP after recombinant expression in LAM 1000 *E. coli*.

| <b>F-TRAP</b> | <b>TRAP</b>  |
|---------------|--------------|
| 29.17 ± 3.91  | 48.30 ± 6.43 |

<sup>a</sup> Yields are an average of three separate expressions under identical conditions

**Table S2.** Trifluoroleucine (TFL) incorporation levels as measured by Amino Acid Analysis (AAA) and MALDI-TOF MS Analysis.

|                       | <b>AAA</b>    | <b>MALDI-TOF</b> |
|-----------------------|---------------|------------------|
| TFL Incorporation (%) | 81.36 ± 5.22% | 80.90 ± 1.02%    |

**Table S3.** Mean residue ellipticity values and melting temperatures of F-TRAP and TRAP.

| <b>Protein</b> | <b>-<math>\theta_{208}</math> (deg•cm<sup>2</sup>•dmol<sup>-1</sup>)</b> | <b>-<math>\theta_{222}</math> (deg•cm<sup>2</sup>•dmol<sup>-1</sup>)</b> | <b>T<sub>m</sub> (°C)</b> |
|----------------|--------------------------------------------------------------------------|--------------------------------------------------------------------------|---------------------------|
| F-TRAP         | -10615.40 ± 2955.19                                                      | -10270.90 ± 2753.07                                                      | 59.3 ± 2.3                |
| TRAP           | -15458.43 ± 938.32                                                       | -14901.35 ± 1350.70                                                      | 54.0 ± 2.0                |

**Table S4.** Inverse transition temperatures of F-TRAP and TRAP.

| <b>Conc. (mg/mL)</b> | <b>F-TRAP T<sub>t</sub> (°C)</b> | <b>TRAP T<sub>t</sub> (°C)</b> |
|----------------------|----------------------------------|--------------------------------|
| 1.00                 | 45.71 ± 0.51                     | 41.60 ± 0.56                   |
| 0.75                 | 46.36 ± 0.03                     | 42.48 ± 0.24                   |
| 0.50                 | 47.87 ± 0.72                     | 44.16 ± 0.30                   |
| 0.20                 | 52.04 ± 0.84                     | 47.32 ± 1.39                   |

**Table S5.** F-TRAP particle z-average diameters measured by dynamic light scattering.

| <b>Temperature (°C)</b> | <b>0.5 mg/mL</b> | <b>0.75 mg/mL</b> | <b>1.0 mg/mL</b> |
|-------------------------|------------------|-------------------|------------------|
| 20                      | 30.30 ± 0.60     | 30.26 ± 0.81      | 30.83 ± 0.53     |
| 21                      | 27.44 ± 1.26     | 29.97 ± 0.36      | 30.67 ± 0.15     |
| 22                      | 28.27 ± 1.04     | 29.98 ± 0.68      | 29.87 ± 0.35     |
| 23                      | 28.73 ± 1.32     | 29.31 ± 0.92      | 28.61 ± 0.76     |
| 24                      | 27.07 ± 0.22     | 27.95 ± 0.08      | 28.39 ± 0.19     |
| 25                      | 25.21 ± 1.07     | 27.95 ± 0.42      | 27.54 ± 0.13     |
| 26                      | 26.16 ± 1.40     | 27.21 ± 0.42      | 27.64 ± 0.29     |
| 27                      | 25.42 ± 0.76     | 26.42 ± 0.11      | 28.07 ± 0.39     |
| 28                      | 23.19 ± 1.34     | 25.16 ± 0.07      | 27.60 ± 0.64     |
| 29                      | 25.65 ± 0.51     | 25.12 ± 0.30      | 29.27 ± 0.67     |
| 30                      | 24.04 ± 2.22     | 24.88 ± 0.89      | 29.37 ± 1.13     |
| 31                      | 24.47 ± 0.37     | 24.19 ± 0.47      | 29.43 ± 0.35     |
| 32                      | 24.16 ± 0.79     | 24.65 ± 0.49      | 30.85 ± 0.33     |
| 33                      | 24.40 ± 1.21     | 24.74 ± 0.21      | 31.83 ± 1.55     |
| 34                      | 20.96 ± 0.70     | 23.74 ± 0.15      | 33.70 ± 1.13     |
| 35                      | 23.18 ± 1.25     | 24.05 ± 0.33      | 33.70 ± 0.64     |
| 36                      | 22.83 ± 0.79     | 23.76 ± 0.46      | 34.98 ± 0.68     |
| 37                      | 22.72 ± 0.13     | 25.04 ± 0.10      | 35.76 ± 0.98     |
| 38                      | 22.37 ± 1.13     | 31.08 ± 1.74      | 36.00 ± 0.35     |
| 39                      | 28.33 ± 1.20     | 35.87 ± 0.88      | 37.46 ± 0.28     |
| 40                      | 42.32 ± 3.46     | 38.03 ± 0.76      | 41.06 ± 0.70     |

|    |                    |                    |                      |
|----|--------------------|--------------------|----------------------|
| 41 | $48.63 \pm 0.87$   | $40.70 \pm 1.14$   | $51.78 \pm 5.67$     |
| 42 | $48.62 \pm 2.16$   | $56.83 \pm 1.36$   | $73.75 \pm 6.27$     |
| 43 | $95.65 \pm 44.54$  | $79.80 \pm 7.77$   | $146.70 \pm 48.91$   |
| 44 | $187.30 \pm 24.21$ | $126.80 \pm 38.20$ | $470.30 \pm 15.17$   |
| 45 | $210.20 \pm 56.53$ | $321.70 \pm 49.44$ | $710.40 \pm 20.38$   |
| 46 | $329.20 \pm 37.58$ | $588.80 \pm 59.10$ | $831.80 \pm 38.19$   |
| 47 | $486.70 \pm 48.17$ | $712.80 \pm 55.82$ | $868.90 \pm 58.57$   |
| 48 | $546.70 \pm 20.40$ | $750.50 \pm 62.01$ | $879.60 \pm 105.90$  |
| 49 | $589.20 \pm 18.15$ | $819.40 \pm 43.95$ | $901.80 \pm 107.60$  |
| 50 | $688.90 \pm 31.74$ | $888.30 \pm 93.30$ | $1279.00 \pm 205.20$ |

**Table S6.** TRAP particle z-average diameters measured by dynamic light scattering.

| <b>Temperature (°C)</b> | <b>0.5 mg/mL</b> | <b>0.75 mg/mL</b> | <b>1.0 mg/mL</b> |
|-------------------------|------------------|-------------------|------------------|
| 20                      | 32.14 ± 1.20     | 30.81 ± 0.39      | 31.93 ± 0.22     |
| 21                      | 31.23 ± 0.40     | 30.16 ± 0.33      | 31.38 ± 0.39     |
| 22                      | 30.18 ± 0.50     | 29.97 ± 0.18      | 30.61 ± 0.34     |
| 23                      | 29.35 ± 0.77     | 29.66 ± 0.26      | 29.91 ± 0.74     |
| 24                      | 28.76 ± 0.31     | 28.83 ± 0.70      | 29.89 ± 0.33     |
| 25                      | 28.65 ± 0.52     | 28.40 ± 0.74      | 29.65 ± 0.26     |
| 26                      | 28.81 ± 0.16     | 28.17 ± 0.22      | 30.01 ± 0.45     |
| 27                      | 28.64 ± 0.54     | 29.15 ± 0.42      | 29.50 ± 0.34     |
| 28                      | 29.21 ± 0.56     | 28.87 ± 0.17      | 31.07 ± 0.26     |
| 29                      | 29.41 ± 1.20     | 30.78 ± 0.54      | 31.35 ± 0.66     |
| 30                      | 29.12 ± 0.73     | 30.35 ± 0.96      | 31.92 ± 0.10     |
| 31                      | 29.01 ± 0.49     | 31.06 ± 1.91      | 31.93 ± 0.23     |
| 32                      | 29.40 ± 1.08     | 31.74 ± 0.24      | 33.12 ± 0.51     |
| 33                      | 29.91 ± 1.12     | 32.28 ± 0.50      | 31.88 ± 0.41     |
| 34                      | 30.30 ± 1.01     | 31.91 ± 1.31      | 31.75 ± 2.42     |
| 35                      | 30.21 ± 1.24     | 32.74 ± 0.84      | 28.53 ± 0.70     |
| 36                      | 29.65 ± 0.34     | 30.50 ± 1.38      | 29.38 ± 0.51     |
| 37                      | 31.05 ± 0.86     | 30.02 ± 1.01      | 31.26 ± 0.70     |
| 38                      | 32.64 ± 0.31     | 30.67 ± 1.55      | 32.70 ± 0.48     |
| 39                      | 33.95 ± 0.12     | 33.36 ± 0.99      | 34.29 ± 1.07     |

|    |                    |                      |                       |
|----|--------------------|----------------------|-----------------------|
| 40 | $35.79 \pm 1.28$   | $40.84 \pm 4.86$     | $63.72 \pm 6.33$      |
| 41 | $56.53 \pm 8.57$   | $95.24 \pm 11.48$    | $185.40 \pm 42.30$    |
| 42 | $177.50 \pm 25.33$ | $396.20 \pm 21.20$   | $818.20 \pm 103.20$   |
| 43 | $408.30 \pm 25.45$ | $602.10 \pm 37.48$   | $1175.00 \pm 84.89$   |
| 44 | $578.00 \pm 56.19$ | $694.70 \pm 62.50$   | $1399.00 \pm 199.50$  |
| 45 | $669.20 \pm 84.52$ | $777.30 \pm 45.80$   | $1533.00 \pm 215.60$  |
| 46 | $724.40 \pm 70.68$ | $783.50 \pm 52.52$   | $1681.00 \pm 398.80$  |
| 47 | $747.90 \pm 42.48$ | $761.10 \pm 55.40$   | $1835.00 \pm 217.10$  |
| 48 | $771.10 \pm 43.12$ | $779.10 \pm 70.24$   | $1320.00 \pm 209.80$  |
| 49 | $817.50 \pm 20.62$ | $955.00 \pm 208.70$  | $1973.00 \pm 802.40$  |
| 50 | $823.90 \pm 72.82$ | $1676.00 \pm 438.00$ | $2648.00 \pm 1352.00$ |

**Table S7.** F-TRAP particle measurements by transmission electron microscopy. Protein samples were incubated at 20°C and 0.5 mg/mL prior to spotting, and particles were measured using ImageJ.

| <b>Particle No.</b> | <b>Area (nm<sup>2</sup>)</b> | <b>Perimeter (nm)</b> | <b>Feret Diameter (nm)</b> | <b>Circularity</b> |
|---------------------|------------------------------|-----------------------|----------------------------|--------------------|
| 1                   | 608                          | 109.207               | 39.446                     | 0.640637155        |
| 2                   | 324                          | 73.351                | 26.907                     | 0.756732575        |
| 3                   | 500                          | 86.517                | 32.802                     | 0.839414753        |
| 4                   | 300                          | 65.677                | 25.612                     | 0.873985321        |
| 5                   | 575                          | 90.657                | 33.526                     | 0.879173634        |
| 6                   | 315.75                       | 79.018                | 27.785                     | 0.635478395        |
| 7                   | 366.5                        | 80.826                | 34.409                     | 0.704987316        |
| 8                   | 480.5                        | 86.319                | 34.000                     | 0.810382564        |
| 9                   | 410.5                        | 76.012                | 31.241                     | 0.892808547        |
| 10                  | 415                          | 80.319                | 32.558                     | 0.808390141        |
| 11                  | 501                          | 100.939               | 35.384                     | 0.617915696        |
| 12                  | 523                          | 94.221                | 32.558                     | 0.740313668        |
| 13                  | 441                          | 81.513                | 32.802                     | 0.834054313        |
| 14                  | 566.5                        | 93.073                | 32.802                     | 0.821792146        |
| 15                  | 240                          | 68.441                | 25.298                     | 0.64385496         |
| 16                  | 434.5                        | 84.03                 | 32.802                     | 0.773268913        |
| 17                  | 432                          | 80.623                | 31.623                     | 0.835170865        |
| 18                  | 483.5                        | 101.161               | 41.231                     | 0.59371736         |
| 19                  | 374.5                        | 77.781                | 30.529                     | 0.777882989        |
| 20                  | 324                          | 66.538                | 24.413                     | 0.919634006        |

|    |         |         |        |             |
|----|---------|---------|--------|-------------|
| 21 | 644.5   | 115.314 | 41.231 | 0.609071593 |
| 22 | 409.5   | 82.548  | 32.249 | 0.755179674 |
| 23 | 751     | 123.438 | 48.332 | 0.619372161 |
| 24 | 669.5   | 102.861 | 41.037 | 0.79516745  |
| 25 | 892.5   | 119.235 | 48.374 | 0.788878663 |
| 26 | 597.5   | 110.603 | 36.056 | 0.613781216 |
| 27 | 587     | 95.856  | 31.241 | 0.802803013 |
| 28 | 1234.75 | 152.049 | 60.926 | 0.671152783 |
| 29 | 1269    | 166.074 | 56.321 | 0.57818634  |
| 30 | 481     | 81.9    | 29.732 | 0.901128593 |



**Table S8.** TRAP particle measurements by transmission electron microscopy. Protein samples were incubated at 20°C and 0.5 mg/mL prior to spotting, and particles were measured using ImageJ.

| <b>Particle No.</b> | <b>Area (nm<sup>2</sup>)</b> | <b>Perimeter (nm)</b> | <b>Feret Diameter (nm)</b> | <b>Circularity</b> |
|---------------------|------------------------------|-----------------------|----------------------------|--------------------|
| 1                   | 399.434                      | 88.41                 | 32.311                     | 0.642173           |
| 2                   | 418.104                      | 93.133                | 31.759                     | 0.605741           |
| 3                   | 412.7                        | 81.26                 | 26.965                     | 0.785399           |
| 4                   | 1209.603                     | 140.712               | 44.958                     | 0.767697           |
| 5                   | 515.875                      | 122.616               | 46.685                     | 0.431181           |
| 6                   | 210.28                       | 56.885                | 19.85                      | 0.816605           |
| 7                   | 679.481                      | 141.755               | 43.548                     | 0.424923           |
| 8                   | 389.608                      | 78.873                | 25.408                     | 0.787011           |
| 9                   | 807.712                      | 110.456               | 42.382                     | 0.831931           |
| 10                  | 537.492                      | 97.465                | 33.063                     | 0.711024           |
| 11                  | 822.943                      | 141.299               | 44.137                     | 0.517966           |
| 12                  | 383.221                      | 75.419                | 29.944                     | 0.846637           |
| 13                  | 1093.163                     | 130.088               | 46.758                     | 0.811746           |
| 14                  | 782.164                      | 108.17                | 41.039                     | 0.840028           |
| 15                  | 434.809                      | 90.864                | 36.354                     | 0.661796           |
| 16                  | 407.787                      | 97.997                | 36.042                     | 0.533602           |
| 17                  | 455.935                      | 90.313                | 33.936                     | 0.702444           |
| 18                  | 574.341                      | 92.54                 | 33.322                     | 0.842792           |
| 19                  | 304.12                       | 78.891                | 26.01                      | 0.614044           |
| 20                  | 310.999                      | 74.796                | 27.914                     | 0.698573           |

|    |         |         |        |          |
|----|---------|---------|--------|----------|
| 21 | 288.399 | 69.97   | 26.339 | 0.740252 |
| 22 | 626.911 | 103.246 | 36.99  | 0.739042 |
| 23 | 301.173 | 84.23   | 31.697 | 0.533448 |
| 24 | 550.266 | 109.68  | 38.577 | 0.574814 |
| 25 | 160.658 | 52.48   | 20.072 | 0.733034 |
| 26 | 566.48  | 128.947 | 45.491 | 0.428126 |
| 27 | 464.779 | 98.45   | 35.444 | 0.602594 |
| 28 | 521.77  | 97.256  | 33.241 | 0.693196 |
| 29 | 197.015 | 78.502  | 28.601 | 0.401742 |
| 30 | 607.75  | 120.476 | 50.355 | 0.526179 |

**Table S9.** Doxorubicin loading efficiencies and weighted loading amounts for F-TRAP and TRAP.

| <b>Protein</b> | <b>Loading Efficiency (%)<br/>(Total recovered<br/>Doxorubicin in protein)</b> | <b>Weighted Loading<br/>(<math>\mu\text{g}</math> Doxorubicin/<br/>mg protein)</b> |
|----------------|--------------------------------------------------------------------------------|------------------------------------------------------------------------------------|
| <b>F-TRAP</b>  | 49.10                                                                          | $29.90 \pm 2.68$                                                                   |
| <b>TRAP</b>    | 17.80                                                                          | $19.22 \pm 2.19$                                                                   |

**Table S10.**  $^{19}\text{F}$   $R_1$  relaxometry values as a function of concentration and temperature.

| Concentration<br>(mg/mL) | $R_1$ ( $1/T_1$ ) msec <sup>-1</sup> |            |             |            |
|--------------------------|--------------------------------------|------------|-------------|------------|
|                          | Temperature (°C)                     |            |             |            |
|                          | 22                                   | 27         | 32          | 37         |
| 0.50                     | 0.0040348                            | 0.00270446 | 0.002594862 | 0.00256192 |
| 0.60                     | 0.00259622                           | 0.00249556 | 0.002279176 | 0.0021438  |
| 0.75                     | 0.00221131                           | 0.00214099 | 0.001976    | 0.00179558 |
| 0.90                     | 0.00254573                           | 0.00243374 | 0.002244649 | 0.00214064 |

**Table S11.**  $^{19}\text{F}$   $R_2$  Relaxometry values as a function of concentration and temperature.

| Concentration<br>(mg/mL) | $R_2$ ( $1/T_2$ ) msec <sup>-1</sup> |            |            |            |
|--------------------------|--------------------------------------|------------|------------|------------|
|                          | Temperature (°C)                     |            |            |            |
|                          | 22                                   | 27         | 32         | 37         |
| 0.50                     | 0.45372051                           | 1.18743551 | 2.40390972 | 3.08211051 |
| 0.60                     | 0.99502488                           | 2.23005218 | 4.79002908 | 6.29683269 |
| 0.75                     | 1.23986104                           | 2.44156123 | 4.64787685 | 7.45311988 |
| 0.90                     | 0.84175084                           | 2.58797832 | 4.64699131 | 8.30288941 |

## REFERENCE

- (1) Shrivastava, A.; Gupta, V. Methods for the Determination of Limit of Detection and Limit of Quantitation of the Analytical Methods. *Chron. Young Sci.* **2011**, 2, 21–25.
